# Supplementary material for: Assessment of pancreatic neuroendocrine tumor cytologic genotype diversity to guide personalized medicine using a custom gastroenteropancreatic next-generation sequencing panel
Source: PubMed Central journal article supplement (PMC5706811; doi:10.18632/oncotarget.18750), 2017-06-28
Supplement: oncotarget-08-93464-s001.pdf [file oncotarget-08-93464-s001.pdf]

# Assessment of pancreatic neuroendocrine tumor cytologic genotype diversity to guide personalized medicine using a custom gastroenteropancreatic next-generation sequencing panel

## SUPPLEMENTARY MATERIALS

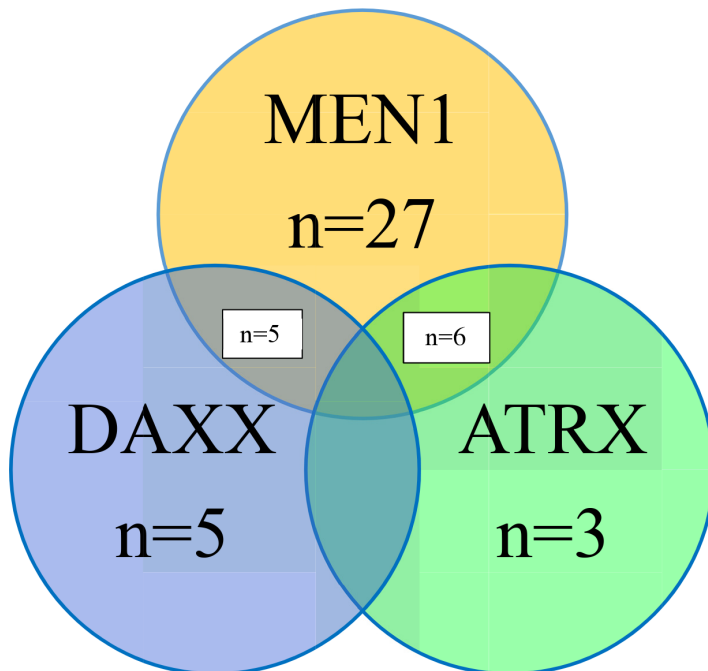

Supplementary Figure 1: Distribution of MEN1, DAXX and ATRX primary tumor variants.

Supplementary Table 1: Custom 15 gene gastroenteropancreatic panel specifics

| <i>locus</i>  | <b>chrom</b> | <b>target regions</b> | <b>target bases</b> | <b>bases covered</b> | <b>% bases covered</b> | <b>amplicons</b> | <b>size min</b> | <b>size avg</b> | <b>size max</b> |
|---------------|--------------|-----------------------|---------------------|----------------------|------------------------|------------------|-----------------|-----------------|-----------------|
| <i>NRAS</i>   | chr1         | 3                     | 570                 | 570                  | 100                    | 8                | 130             | 145             | 150             |
| <i>RET</i>    | chr10        | 12                    | 2,363               | 2,124                | 89.9                   | 30               | 124             | 157             | 200             |
| <i>PTEN</i>   | chr10        | 9                     | 1572                | 1520                 | 196.4                  | 26               | 131             | 147             | 200             |
| <i>HRAS</i>   | chr11        | 3                     | 570                 | 306                  | 53.7                   | 6                | 123             | 156             | 199             |
| <i>MEN1</i>   | chr11        | 9                     | 2,208               | 1,995                | 90.4                   | 29               | 125             | 153             | 195             |
| <i>KRAS</i>   | chr12        | 3                     | 570                 | 570                  | 100                    | 9                | 130             | 142             | 150             |
| <i>RBI</i>    | chr13        | 27                    | 3,867               | 3,690                | 95.4                   | 64               | 130             | 146             | 191             |
| <i>TSC2</i>   | chr16        | 42                    | 7377                | 6584                 | 92.8                   | 103              | 120             | 156             | 200             |
| <i>TP53</i>   | chr17        | 11                    | 1,743               | 1,742                | 99.9                   | 30               | 120             | 146             | 178             |
| <i>VHL</i>    | chr3         | 3                     | 762                 | 700                  | 91.9                   | 9                | 133             | 147             | 186             |
| <i>CTNNB1</i> | chr3         | 1                     | 268                 | 268                  | 100                    | 4                | 133             | 142             | 150             |
| <i>PIK3CA</i> | chr3         | 8                     | 1,863               | 1,837                | 98.6                   | 29               | 130             | 146             | 150             |
| <i>DAXX</i>   | chr6         | 8                     | 2,596               | 2,596                | 100                    | 40               | 120             | 145             | 177             |
| <i>BRAF</i>   | chr7         | 3                     | 495                 | 416                  | 84                     | 5                | 130             | 156             | 200             |
| <i>ATRX</i>   | chrX         | 36                    | 8,969               | 8,969                | 100                    | 141              | 130             | 145             | 161             |
| Totals        |              | 178                   | 35,793              | 33,887               | 94.7                   | 533              | 120             | 149             | 200             |

Supplementary Table 2: Primary pancreas spectrum vs. pancreas liver met genetic variant spectrum

|     | Gene   | Primary pNET<br>n=90 patients | pNET liver<br>n=32 patients | P value       |
|-----|--------|-------------------------------|-----------------------------|---------------|
| 1.  | MEN1   | 38 (42.2 %)                   | 11 (34.4%)                  | 0.5305        |
| 2.  | DAXX   | 10 (11.1 %)                   | 7 (21.9%)                   | 0.1450        |
| 3.  | ATRX   | 9 (10.0 %)                    | 1 (3.1%)                    | 0.4521        |
| 4.  | TSC2   | 7 (7.8 %)                     | 2 (6.3%)                    | 0.9           |
| 5.  | KRAS   | 3 (3.3 %)                     | 2 (6.3%)                    | 0.6055        |
| 6.  | TP53   | 3 (3.3 %)                     | 5 (15.6%)                   | <b>0.0287</b> |
| 7.  | RB1    | 2 (2.2 %)                     | 0 (0%)                      | 0.9           |
| 8.  | CTNNB1 | 2 (2.2 %)                     | 0 (0%)                      | 0.9           |
| 9.  | RET    | 1 (1.1 %)                     | 0 (0%)                      | 0.9           |
| 10. | PTEN   | 1 (1.1 %)                     | 2 (6.3%)                    | 0.1680        |
| 11. | HRAS   | 1 (1.1 %)                     | 0 (0%)                      | 0.9           |
| 12. | PIK3CA | 1 (1.1 %)                     | 0 (0%)                      | 0.9           |
| 13. | VHL    | 0 (0%)                        | 1 (3.1%)                    | 0.2623        |

<sup>o</sup>NRAS and BRAF not include as no identified variants.

**Supplementary Table 3: Pathogenic alterations and Variants of Unknown Significance (VUS) breakdown**

|     | <b>Gene</b> | <b>No. of variants identified</b> | <b>No. of pathogenic alterations</b> | <b>No. of VUS</b> |
|-----|-------------|-----------------------------------|--------------------------------------|-------------------|
| 1.  | MEN1        | 43                                | 43                                   | 0                 |
| 2.  | DAXX        | 10                                | 8                                    | 2                 |
| 3.  | ATRX        | 12                                | 6                                    | 6                 |
| 4.  | TSC2        | 7                                 | 5                                    | 2                 |
| 5.  | KRAS        | 3                                 | 3                                    | 0                 |
| 6.  | TP53        | 3                                 | 3                                    | 0                 |
| 7.  | RB1         | 2                                 | 2                                    | 0                 |
| 8.  | CTNNB1      | 2                                 | 2                                    | 0                 |
| 9.  | RET         | 1                                 | 0                                    | 1                 |
| 10. | PTEN        | 1                                 | 1                                    | 0                 |
| 11. | HRAS        | 1                                 | 0                                    | 1                 |
| 12. | PIK3CA      | 1                                 | 0                                    | 1                 |
| 13. | NRAS        | 0                                 | 0                                    | 0                 |
| 14. | VHL         | 0                                 | 0                                    | 0                 |
| 15. | BRAF        | 0                                 | 0                                    | 0                 |

Supplementary Table 4: MEN1 mutation nomenclature and consequence

|     | Number of Variants | Current Mutation Nomenclature                     | Consequence         |
|-----|--------------------|---------------------------------------------------|---------------------|
| 1.  | 1                  | MEN1 c.978delC, p.Tyr326*                         | frameshift variant  |
| 2.  | 1                  | MEN1 c.928G>C, p.Gly310Arg                        | missense variant    |
| 3.  | 1                  | MEN1 c.872T>C, p.Leu291Pro                        | missense variant    |
| 4.  | 1                  | MEN1 c.798+1G>A                                   | splice site variant |
| 5.  | 1                  | MEN1 c.76G>T, p.Glu26*                            | nonsense            |
| 6.  | 1                  | MEN1 c.740C>T, p.Ala247Val                        | missense variant    |
| 7.  | 1                  | MEN1 c.729delC, p.Phe243Leufs*43                  | frameshift variant  |
| 8.  | 2                  | MEN1 c.669+3A>G                                   | splice site variant |
| 9.  | 1                  | MEN1 c.628delG, p.Asp210Thrfs*19                  | frameshift variant  |
| 10. | 1                  | MEN1 c.608G>A, p.Trp203*                          | nonsense            |
| 11. | 1                  | MEN1 c.56_68delinsGG, p.Val19Glyfs*94             | frameshift variant  |
| 12. | 1                  | MEN1 c.551A>T, p.Glu184Val                        | missense variant    |
| 13. | 1                  | MEN1 c.531delT, p.Asp177Gluufs*13                 | frameshift variant  |
| 14. | 1                  | MEN1 c.518T>C, p.Leu173Pro                        | missense variant    |
| 15. | 1                  | MEN1 c.511C>T, p.Gln171*                          | nonsense            |
| 16. | 1                  | MEN1 c.509G>A, p.Cys170Tyr                        | missense variant    |
| 17. | 1                  | MEN1 c.493_505delGCTGTGGTTGGGG, p.Ala165Profs*21  | frameshift variant  |
| 18. | 1                  | MEN1 c.493_505del, p.Ala165Profs*21               | frameshift variant  |
| 19. | 1                  | MEN1 c.488C>A, p.Ala163Asp                        | missense variant    |
| 20. | 1                  | MEN1 c.402delC, p.Phe134Leufs*20                  | frameshift variant  |
| 21. | 1                  | MEN1 c.381_382delCA, p.Asn127Lysfs*57             | frameshift variant  |
| 22. | 2                  | MEN1 c.360_373delGGTCTCCGATGTCA, p.Lys120Asnfs*60 | frameshift variant  |
| 23. | 1                  | MEN1 c.322C>T, p.Arg108*                          | nonsense            |
| 24. | 1                  | MEN1 c.2T>G                                       | start loss          |
| 25. | 1                  | MEN1 c.248delT, p.Leu83Argfs*36                   | frameshift variant  |
| 26. | 1                  | MEN1 c.207delC, p.Asp70Thrfs*49                   | frameshift variant  |
| 27. | 1                  | MEN1 c.1675C>T, p.Gln559*                         | nonsense            |
| 28. | 1                  | MEN1 c.1372delinsGTCGGG, p.Gln458ValfsX7          | Frameshift variant  |
| 29. | 1                  | MEN1 c.1372C>T, p.Gln458*                         | nonsense            |
| 30. | 1                  | MEN1 c.133G>T, p.Glu45*                           | nonsense            |
| 31. | 1                  | MEN1 c.1282_1297del, p.Trp428Profs*17             | frameshift variant  |
| 32. | 1                  | MEN1 c.1277_1278delGCinsAA, p.Cys426*             | nonsense            |
| 33. | 1                  | MEN1 c.1267G>T, p.Asp423Tyr                       | missense variant    |
| 34. | 3                  | MEN1 c.1258C>T, p.Arg420*                         | nonsense            |
| 35. | 1                  | MEN1 c.1192C>T, p.Gln398*                         | nonsense            |
| 36. | 2                  | MEN1 c.117_128delGGTGCTGGGCTT, p.Leu39_Gly42del   | In frame deletion   |
| 37. | 1                  | MEN1 c.1109_1110delTT, p.Phe370*                  | frameshift variant  |
| 38. | 1                  | MEN1 c.1046C>G, p.Thr349Arg                       | missense variant    |

**Supplementary Table 5: DAXX mutation nomenclature and consequence**

|    | Number of variants | Current Mutation Nomenclature       | Consequence        |
|----|--------------------|-------------------------------------|--------------------|
| 1. | 1                  | DAXX c.344G>A, p.Arg115Gln          | missense variant   |
| 2. | 1                  | DAXX c.1898G>A, p.Arg633Gln         | missense variant   |
| 3. | 1                  | DAXX c.905_906del, p.Leu302Argfs*41 | frameshift variant |
| 4. | 1                  | DAXX c.825del, p.Asn276Thrfs*18     | frameshift variant |
| 5. | 1                  | DAXX c.660_664del, p.Ala221Profs*9  | frameshift variant |
| 6. | 1                  | DAXX c.61C>T, p.Gln21*              | nonsense           |
| 7. | 1                  | DAXX c.2218del, p.Asp740Ilefs*26    | frameshift variant |
| 8. | 1                  | DAXX c.1884dup, p.Cys629Leufs*29    | frameshift variant |
| 9. | 2                  | DAXX c.1884del, p.Cys629Alafs*16    | frameshift variant |

\*n=7 (70%) frameshift variant; n=2 (20%) missense variant; n=1 (10%) stop gained.

Supplementary Table 6: ATRX mutation nomenclature and consequence

|     | Number of variants | Current Mutation Nomenclature    | Consequence         |
|-----|--------------------|----------------------------------|---------------------|
| 1.  | 2                  | ATRX c.6835G>T, p.Glu2279*       | nonsense            |
| 2.  | 2                  | ATRX c.6825G>A, p.Trp2275*       | nonsense            |
| 3.  | 1                  | ATRX c.6577C>G, p.Gln2193Glu     | missense variant    |
| 4.  | 1                  | ATRX c.5186C>A, p.Ser1729Tyr     | missense variant    |
| 5.  | 1                  | ATRX c.3943+1_3943+3delGTG       | splice site variant |
| 6.  | 1                  | ATRX c.3814G>C, p.Ala1272Pro     | missense variant    |
| 7.  | 1                  | ATRX c.3700G>C, p.Val1234Leu     | missense variant    |
| 8.  | 1                  | ATRX c.2919dupG, p.Ser974Glufs*3 | frameshift variant  |
| 9.  | 1                  | ATRX c.2893G>A, p.Ala965Thr      | missense variant    |
| 10. | 1                  | ATRX c.2484G>C, p.Met828Ile      | missense variant    |

\*n=6 (50%) missense variant; n=4 (33.3%) stop gained; n=1 (8.3%) frameshift variant; n=1 (8.3%) splice site variant.

Supplementary Table 7: TSC2 mutation nomenclature and consequence

|    | Number of variants | Current Mutation Nomenclature       | Consequence         |
|----|--------------------|-------------------------------------|---------------------|
| 1. | 1                  | TSC2 c.849_850del, p.Arg283Serfs*54 | frameshift variant  |
| 2. | 1                  | TSC2 c.5260-1G>T                    | splice site variant |
| 3. | 1                  | TSC2 c.45dup, p.Lys16*              | frameshift variant  |
| 4. | 1                  | TSC2 c.436C>G, p.Leu146Val          | missense variant    |
| 5. | 1                  | TSC2 c.400G>A, p.Glu134Lys          | missense variant    |
| 6. | 1                  | TSC2 c.3298G>A, p.Val1100Met        | missense variant    |
| 7. | 1                  | TSC2 c.1080del, p.Leu361Cysfs*2     | frameshift variant  |

\* n=3 (42.9%) missense variant; n=3 (42.9%) frameshift variant; n=1 (14.3%) splice site variant.



Supplementary Table 8: Patients with stage T1N0M0 pNETs harboring adverse prognostic biomarkers with outcome

|    | Age (years) | Lesion size/location | Genetic Variant | Surgery                        | Disease progression | Time of Disease Progression | Mortality                   |
|----|-------------|----------------------|-----------------|--------------------------------|---------------------|-----------------------------|-----------------------------|
| 1. | 76          | 12mm neck            | KRAS, RB1, TP53 | Whipple Procedure              | Liver metastasis    | 0.5 years                   | 0.97 years                  |
| 2. | 39          | 17mm neck            | TSC2            | Extended distal pancreatectomy | Liver metastasis    | 10.9 years                  | No                          |
| 3. | 68          | 10mm body            | TSC2            | No surgery                     | No progression      | No progression              | 2.4 years unrelated to pNET |
